# Supplementary material for: RAD-Deficient Human Cardiomyocytes Develop Hypertrophic Cardiomyopathy Phenotypes Due to Calcium Dysregulation
Source: PubMed Central journal article supplement (PMC7642210; doi:10.3389/fcell.2020.585879), 2020-10-22
Supplement: Data_Sheet_1.pdf [file Data_Sheet_1.pdf]

**Table S1. Primer sequences used for q-PCR**

| Gene    | Forward 5'-3'            | Reverse 5'-3'              |
|---------|--------------------------|----------------------------|
| NPPA    | ACAATGCCGTGTCCAACGCAGA   | CTTCATTCCGGCTCACTGAGCAC    |
| NPPB    | TCTGGCTGCTTTGGGAGGAAGA   | CCTTGTGGAATCAGAAGCAGGTG    |
| MYH6    | TCTCCGACAACGCCTATCAGTAC  | GTCACCTATGGCTGCAATGCT      |
| MYH7    | GGCAAGACAGTGACCGTGAAG    | CGTAGCGATCCTTGAGGTTGTA     |
| ACTA1   | AGGTCATCACCATCGGCAACGA   | GCTGTTGTAGGTGGTCTCGTGA     |
| ACTA2   | CTATGCCTCTGGACGCACAAC    | CAGATCCAGACGCATGATGGCA     |
| MYL2    | TACGTTCCGGGAAATGCTGAC    | TTCTCCGTGGGTGATGATG        |
| MYL7    | CCGTCTTCCTCACGCTCTT      | TGAACTCATCCTTGTTACCAC      |
| TNNT2   | TTCACCAAAGATCTGCTCCTCGCT | TTATTACTGGTGTGGAGTGGGTGTGG |
| CX43    | GGAGATGAGCAGTCTGCCTTTC   | TGAGCCAGGTACAAGAGTGTGG     |
| SCN5A   | CTGACCTCACCATCACTATGTG   | GCTGTGAAAATCCCTGTGAAG      |
| KCNA5   | GTTCCGCATCTTCAAGCTCTCC   | CGAAGTAGACGGCACTGGAGAA     |
| KCNH2   | AATCGCCTTCTACCGGAAAAG    | CACCATGTCCTTCTCCATCAC      |
| KCNQ1   | TCTGTCTTTGCCATCTCCTTC    | CCTCCATGCGGTCTGAATG        |
| KCNJ2   | AAGACGGTATGAAGTTGGCC     | CGGGTGTGGACTTTACTCTTC      |
| CACNA1C | CAGAGGCTACGATTTGAGGA     | GCTTCACAAAGAGGTCGTGT       |
| ATP2A2  | GATCACACCGCTGAATCTG      | AGTATTGCGGTTGTTCCAG        |
| PLN     | AGCACGTCAAAAGCTACAGAATCT | CTGATGTGGCAAGCTGCAGATC     |
| RYR2    | AGAACTTACACACGCGACCTG    | CATCTCTAACCGGACCATACTGC    |
| ATP2B4  | CTCACCGAACTGACCTGTATCG   | GGCTGTGTTGATGTTGTACCTG     |
| NCX1    | TCGAGATTGTCTCTTCGGGC     | CATATGCAAACACCGAGGCG       |
| COL1A1  | GATTCCCTGGACCTAAAGGTGC   | AGCCTCTCCATCTTTGCCAGCA     |
| COL4A1  | TGTTGACGGCTTACCTGGAGAC   | GGTAGACCAACTCCAGGCTCTC     |
| CASP3   | GGTATTGAGACAGACAGTGG     | CATGGGATCTGTTTCTTTGC       |
| BCL2    | ATCGCCCTGTGGATGACTGAGT   | GCCAGGAGAAATCAAACAGAGGC    |
| BAX     | TCAGGATGCGTCCACCAAGAAG   | TGTGTCCACGGCGGCAATCATC     |
| CALM1   | CCAACAGAAGCTGAATTGCAGGA  | CAAAGACTCGGAATGCCTCACG     |
| PPP3CA  | GCCCTGATGAACCAACAGTTCC   | GCAGGTGGTTCTTTGAATCGGTC    |
| CAMK2D  | ACACGGTGACTCCTGAAGCCAA   | GTCTCCTGTCTGTGCATCATGG     |
| MEF2A   | CAAGGGCATGATGCCTCCACTA   | GCTGAGTACACAAGTCCTTGCG     |
| GATA4   | GCGGTGCTTCCAGCAACTCCA    | GACATCGCACTGACTGAGAACG     |
| NFATC4  | GCACCGTATCACAGGCAAGATG   | TCAGGATTCCTCCGCGCAGTCAAT   |
| CACNB2  | TTCCATGCGACCAGTGGTCCTA   | GCGTTTGGCAAGCGAGATGTCA     |
| ITPR1   | GTGACAGGAAACATGCAGACTCG  | CAGCAGTTGCACAAAGACAGGC     |
| GAPDH   | GGAGCGAGATCCCTCCAAAAT    | GGCTGTTGTCATACTTCTCATGG    |
