# Supplementary material for: RAD-Deficient Human Cardiomyocytes Develop Hypertrophic Cardiomyopathy Phenotypes Due to Calcium Dysregulation
Source: PubMed Central journal article supplement (PMC7642210; doi:10.3389/fcell.2020.585879), 2020-10-22
Supplement: Data_Sheet_2.pdf [file Data_Sheet_2.pdf]

**Table S2. Primary and Secondary Antibodies**

| Type                          | Antibody                                    | Application        | Dilution          | Species                 | Manufacturer And Catalog Number |
|-------------------------------|---------------------------------------------|--------------------|-------------------|-------------------------|---------------------------------|
| Primary                       | Anti-OCT4                                   | Immunofluorescence | 1:100             | Rabbit Polyclonal       | Santa Cruz sc-9081              |
|                               | Anti-SSEA4                                  | Immunofluorescence | 1:100             | Mouse Monoclonal        | Santa Cruz sc-21704             |
|                               | Anti-MLC2a                                  | Immunofluorescence | 1:100             | Mouse Monoclonal        | Santa Cruz sc-365255            |
|                               | Anti-MLC2v                                  | Immunofluorescence | 1:50              | Rabbit Polyclonal       | Proteintech 10906-1-AP          |
|                               | Anti-Rad GTPase                             | Western blot       | 1:1000            | Mouse Monoclonal        | Santa Cruz sc-373988            |
|                               | Anti- $\alpha$ -actinin                     | Immunofluorescence | 1:100             | Rabbit Polyclonal       | Abcam Ab137346                  |
|                               |                                             | Western blot       | 1:1000            |                         |                                 |
|                               | Anti-cTnT                                   | Immunofluorescence | 1:100             | Mouse Monoclonal        | Abcam Ab8295                    |
|                               |                                             | Western blot       | 1:1000            |                         |                                 |
|                               |                                             | Flow cytometry     | 1:200             |                         |                                 |
|                               | Anti-MYH7                                   | Western blot       | 1:1000            | Mouse Monoclonal        | Abcam Ab 174640                 |
|                               | Anti-Bcl2                                   | Western blot       | 1:1000            | Rabbit Polyclonal       | Proteintech 12789-1-AP          |
|                               | Anti-Bax                                    | Western blot       | 1:1000            | Rabbit Polyclonal       | Proteintech 50599-2-AP          |
|                               | Anti-SERCA2a                                | Western blot       | 1:1000            | Rabbit Monoclonal       | Cell signaling #9580            |
|                               | Anti-PLN                                    | Western blot       | 1:1000            | Rabbit Polyclonal       | Cell signaling #8495            |
|                               | Anti-L-type Ca <sup>2+</sup> CP $\alpha$ 1C | Western blot       | 1:1000            | Mouse Monoclonal        | Santa Cruz sc-398433            |
|                               | Anti-L-type Ca <sup>2+</sup> CP $\beta$ 2   | Western blot       | 1:1000            | Mouse Monoclonal        | Santa Cruz sc-81890             |
|                               | Anti-Phospho-CaMKII(Thr286)                 | Western blot       | 1:1000            | Rabbit Monoclonal       | Cell signaling #12716           |
|                               | Anti-CaMKII                                 | Western blot       | 1:1000            | Rabbit Monoclonal       | Abcam Ab52476                   |
|                               | Anti- Calcineurin                           | Western blot       | 1:1000            | Rabbit Polyclonal       | Cell signaling #2614            |
| Anti-GAPDH                    | Western blot                                | 1:1000             | Mouse Monoclonal  | Santa Cruz sc-365062    |                                 |
| Anti-IP3R-1                   | Western blot                                | 1:1000             | Mouse Monoclonal  | Santa Cruz sc-271197    |                                 |
| Anti-RyR2                     | Western blot                                | 1:1000             | Mouse Monoclonal  | Santa Cruz sc-376507    |                                 |
| Anti-Phospho-RyR2(Ser2808)    | Western blot                                | 1:1000             | Rabbit Polyclonal | Abcam Ab59225           |                                 |
| Anti-Phospho-RyR2(Ser2814)    | Western blot                                | 1:1000             | Rabbit Polyclonal | Invitrogen #PA5-104558  |                                 |
| Anti-alpha 1 Sodium Potassium | Western blot                                | 1:1000             | Mouse Monoclonal  | Abcam Ab7671            |                                 |
| Secondary                     | Goat anti-Mouse IgG Alexa Fluor 594         | Immunofluorescence | 1:200             | Goat anti-Mouse IgG     | Invitrogen A21145               |
|                               | Goat anti-Rabbit IgG Alexa Fluor 488        | Immunofluorescence | 1:200             | Goat anti-Rabbit IgG    | Invitrogen A32731               |
|                               | Chicken anti-Rabbit IgG Alexa Fluor 594     | Immunofluorescence | 1:200             | Chicken anti-Rabbit IgG | Invitrogen A21442               |
|                               | Chicken anti-Mouse IgG Alexa Fluor 488      | Immunofluorescence | 1:200             | Chicken anti-Mouse IgG  | Invitrogen A21200               |

|                                          |              |         |                      |                  |
|------------------------------------------|--------------|---------|----------------------|------------------|
| Goat anti-Rabbit IgG (H + L) IRDye 800CW | Western blot | 1:20000 | Goat anti-Rabbit IgG | LI-COR 926-32211 |
| Goat anti-Mouse IgG (H + L) IRDye 800CW  | Western blot | 1:20000 | Goat anti-Mouse IgG  | LI-COR 926-32210 |
